# Supplementary material for: When to expect a coup d’état? An extreme bounds analysis of coup determinants
Source: Springer Nature journal article supplement (doi:10.1007/s11127-016-0365-0), 2016-09-27
Supplement: 11127_2016_365_MOESM1_ESM.docx [file 11127_2016_365_MOESM1_ESM.docx]

**Online Appendix 1 for „When to Expect a Coup d’État? An Extreme Bounds Analysis of Coup Determinants“**

**Martin Gassebner, Jerg Gutmann, and Stefan Voigt**

**Public Choice**

| Author(s) | Period | Countries | Obs. | Coup Measure | Explanatory Variables | Effect | Sign. | Empirical Method |
| --- | --- | --- | --- | --- | --- | --- | --- | --- |
| Arbatli and Arbatli (2016)  Arbatli and Arbatli (2016) cont. | 1960-2000 | n/a | 4,766 | MM | MID, by home  MID, not by home  Past coups  MID, favorable home  MID, unfavorable home  MID, other  Civil conflict  Post-Cold War  Coup risk  Income  Population  Small island  Latitude  MID participation  Number of allies  MID, home joiner  Military exp. p.c.  Military pers. p.c.  Civilian regime  Military regime  Mili-Civ regime  Autocracy  Anocracy  Demonstrations  Riots  Strikes  Common law  French legal origin  Socialist legal origin  Ethnic fractionalization  Religious fractionalization  Leader deposed foreign  MID-related fatalities | -  -  +  +  +  +  +  -  +  -  -  +  +  -  +  -  -  +  +  +  +  +  +  +  +  +  +  +  +  +  -  +  + | +  ~  +  ~  ~  +  +  ~  ++  +  ~  ~  ~  +  ~  ++  ~  ~  ~  ~  ~  ~  +  ~  +  +  ~  ~  ~  ~  ~  ~  + | Logit  SUR bivariate probit  FE Logit  Region FE  Year FE |
| Belkin and Schofer (2003) | 1960-2000 | 144 | 4,250 | Own coding | Coup risk  Recent coup  Income  Domestic instability  Military regime  Regional conflict  Recent war | +  +  -  +  +  -  + | ++  ~  +  ++  ++  ~  ~ | RE Logit  Region FE |
| Bell (2016) | 1945-2011 | n/a | 68,878 | MM, PT, own coding | Democracy  Executive constraints  Military regime  Interim regime  Income  Income growth  Military exp. p. personnel  Peace years  Ethnic fractionalization  Leader tenure | -  -  +  +  -  -  -  -  +  - | ~  ++  +  ~  +  ~  ++  ~  +  + | Complementary log-log |
| Bell and Sudduth (2015) | 1950-2011 | 193 | 7,325 | PT | Civil war  Income  Military exp. p. personnel  Military personnel  Paramilitary  Coup-proofing  Democracy  Military dictatorship  Time since coup | +  -  -  -  -  -  ~  +  n.l. | +  ~  ~  +  +  +  ~  ++  + | Probit |

| Böhmelt and Pilster (2015) | 1975-1999 | n/a | 3,060 | PT | Income growth  Income  Instability  Democracy  Authoritarian  Military exp. growth  Military exp. p. personnel  Military personnel  Military regime  Coup-proofing | -  -  +  -  -  -  -  -  +  n.l. | ~  ~  ++  ~  ~  ~  ~  +  ++  + | Probit  Splines |
| --- | --- | --- | --- | --- | --- | --- | --- | --- |
| Bove and Rivera (2015) | 1950-2004 | n/a | 3,333 | Goemans et al. (2009) | Elected legislature  Purges  Income  Income growth  Dissent  Military exp. growth  Military personnel  Military exp. p. personnel  Past coups  Single-party regime  Military regime  Personalist regime  Civil liberties  Repression | -  +  ~  -  +  ~  -  ~  +  +  +  +  -  + | ++  +  ~  +  ++  ~  ~  ~  ++  ~  ~  ~  ~  ~ | Probit |

| Casper (2015) | 1975-2004 | n/a | 2,635 | PT | IMF program  Population  Income  Military capabilities  International reserves  External debt  Winning coalition size  Inflation  Strikes  Income growth  Protests  Riots  Regime type  International conflict  Civil war  Government crisis  Time since coup  Economic reform | +  +  -  -  +  -  -  n.l.  +  n.l.  -  +  +  +  +  +  n.l.  + | +  ~  ~  +  ~  ~  ~  ~  ++  +  ~  ~  ++  ++  ++  ++  ~  ++ | Probit  Region FE |
| --- | --- | --- | --- | --- | --- | --- | --- | --- |
| Casper and Tyson (2014) | 1989-2010 | n/a | 3,045 | MM | Protests  Speech limits  Income growth  Population  Income  Military capabilities  Civil war  Democracy  International conflict  New regime  Time since coup | n.l.  n.l.  -  ~  -  -  +  -  +  +  n.l. | ~  ~  +  ~  +  +  ++  +  ~  ~  + | SUR bivariate probit  Region FE |
| Galetovic and Sanhueza (2000) | 1950-1982 | 89 | 2,243 | Own coding | Recession  Popular unrest  Income  Past coups | +  +  -  + | ++  ++  ++  ++ | Probit  Region FE |

| Girod (2015) | 1970-2009 | n/a | 1,260 | PT | Windfall income  Nonstrategic aid  Development  Global development  Baseline development  Income  Democracy  War deaths  War duration  Incumbent tenure  Irregular entry  Population density  Ethnic fractionalization | n.l.  n.l.  n.l.  +  -  -  +  -  +  -  n.l.  -  + | ~  ~  ~  ~  ~  ~  ~  +  ~  ~  ~  ~  ~ | Logit  Time polynomial  Region FE  Decade FE |
| --- | --- | --- | --- | --- | --- | --- | --- | --- |
| Harkness (2016) | 1952-2012 | 43 | 43 | Own coding | Ethnic & unmatched  Ethnic & matched  Inclusive & unmatched  Prior ethnic violence  Income  Mineral exporter  Ethnic fractionalization | +  +  +  +  -  -  + | ++  ~  ~  ~  ~  ~  ~ | Negative binomial regression |
| Henderson (1997) | 1960-1997 | n/a | 100 | Own coding | Past coups  Regime  Income  Concentration  Linguistic fractionalization  Urbanization  Militarization  Arms transfers | +  -  -  +  n.l.  -  -  + | +  ~  ~  ~  +  +  ~  ~ | Logit |

| Hiroi and Omori (2013) | 1962-2007 | 152 | 5,152 | MM | Income  Urbanization  Party fractionalization  Full democracy  Full autocracy  Income growth  Social instability  Transitional regimes  Cold war  Military leader | -  -  -  -  -  -  n.l.  +  n.l.  + | ++  +  ~  +  +  ~  ++  +  ++  + | Stratified Cox model  Region FE |
| --- | --- | --- | --- | --- | --- | --- | --- | --- |
| Hiroi and Omori (2014) | 1960-2007 | 146 | 4,233 | MM | Ch. in cabinet size  Ch. to left  Ch. in capital openness  Society type  Income  Military leader  Democracy  Cold war  World coups  Foreign aid | n.l.  n.l.  n.l.  n.l.  n.l.  +  +  +  +  + | ~  ~  ~  ~  ~  ~  ~  ++  ~  ~ | Stratified Cox model |
| Houle (2016) | 1960-2008 | 128 | 5,004 |  | Capital share of value added in manufacturing  Top percentile share of income  Net income Gini index  Income  Income growth  Income from oil and gas  Instability  Openness  Ethnic fractionalization  Democracy  Cold war  Time since coup  Coup-proofing | +  +  +  -  -  +  +  -  -  n.l.  +  -  - | ++  ++  ++  ++  ++  +  ~  ~  ~  +  +  ++  ~ | Logit  Splines |

| Jackman (1978) | 1960-1975 | 30 | 30 | Own coding | Social mobilization  Size largest ethnic group  Winning party size  Electoral turnout | n.l.  n.l.  n.l.  n.l. | ~  ~  ~  ~ | OLS |
| --- | --- | --- | --- | --- | --- | --- | --- | --- |
| Jackman et al. (1986) | 1960-1984 | 35 | 35 | Own coding | Military cohesion  Military political centrality  Political pluralism  Turnout pre-independence  Population in agriculture  Ch. population in capital city  Ch. industrial jobs  Income growth  Exports-imports/GDP  Ch. in export commodity concentration | +  +  -  -  -  +  -  -  -  + | +  +  +  +  +  +  ~  +  ~  + | OLS |
| Jenkins and Kposowa (1992) | 1957-1984 | 33 | 33 | Johnson et al. (1984) | Social mobilization  Political factionalism  Military centrality  Ethnic antagonism  Political competition  Export dependence | +  +  +  +  +  - | ~  ~  ++  ++  +  ~ | OLS |
| Johnson and Thyne (2016) | 1952-2005 | 150 | 79,404 | PT | Protests  Protests near capital  Protests away from capital  Violent protests  Peaceful protests  Income  Democracy  Authoritarian  Military regime  Civil conflict  Time since coup | +  +  +  +  +  -  -  -  +  +  n.l. | +  +  +  +  +  +  +  +  +  +  n/a | Logit  Country FE  Year FE  Matching |

| Johnson et al. (1984) | 1960-1982 | 35 | 35 | Own coding | Social mobilization  Size largest ethnic group  Winning party size  Electoral turnout  Military cohesion  Military political centrality  Political pluralism  Turnout pre-independence  Population in agriculture  Ch. population in capital city  Ch. industrial jobs  Income growth  Exports-imports/GDP  Ch. in export commodity concentration | +  n.l.  n.l.  n.l.  +  +  -  -  -  +  -  -  -  + | +  ~  ~  ~  +  ~  +  ~  +  +  +  +  +  + | OLS |
| --- | --- | --- | --- | --- | --- | --- | --- | --- |
| Kim (2016) | 1960-2005 | 148 | 4,604 | PT | Income growth  Income  Democracy  Military dictatorship  Civil war  Interstate war  Past coups  Protests  Military exp./GDP  Military personnel  Time since coup | -  -  +  ~  +  -  +  +  -  +  n.l. | ++  ++  ~  ~  ~  +  +  ++  ~  +  n/a | 2SLS  Country FE  Year FE |

| Kposowa and Jenkins (1993) | 1957-1984 | 33 | 33 | Johnson et al. (1984) | Ethnic dominance  Ethnic plurality  Ethnic competition  Structural capacity  Political awareness  Political factionalism  Military centrality  Ethnic antagonism  Cabinet competition  Export dependence  Debt dependence  Investment dependence | -  +  +  -  -  +  +  +  -  +  -  - | ~  ~  +  ~  +  ++  ++  ++  ~  ~  ++  ~ | OLS |
| --- | --- | --- | --- | --- | --- | --- | --- | --- |
| Lehoucq and Pérez-Liñán (2014) | 1900-2006 | 18 | 1,878 | Own coding | Time since coup  Political competition  Income  Income growth  Family farms  Presidential powers  Regional coups  Diffusion of democracy  Liberal era  ISI era | n.l.  -  -  -  -  -  -  -  -  + | ~  ~  ~  ~  ~  ~  +  +  ~  ~ | RE logit  Conditional FE logit |
| Londregan and Poole (1990) | 1950-1982 | 121 | 3,036 | World Handbook of Political and Social Indicators | Recent coup  Past coups  Income  Income growth  Time since independence | +  +  -  -  n.l. | +  ~  +  ~  ~ | Probit  Simultaneous equations  Region FE |
| Lunde (1991) | 1955-1985 | 92 | 92 | Own coding | Time since independence  Social mobilization  Size largest ethnic group  Winning party size  Electoral turnout  Number of coups  Past coups  Past successful coups | +  +  +  -  -  -  +  + | ++  +  +  +  ~  +  ++  + | Log-logistic |
| Malul and Shoham (2006) | n/a | 59 | 59 | n/a | Income  Individualism  Uncertainty avoidance  Population density  Infrastructure density | -  -  +  +  - | +  +  +  ~  + | Poisson |
| Maniruzzaman (1992) | 1963-1980 | 80 | 80 | Own coding | Arms transfers  Killings  Riots  Strikes | +  +  +  + | ++  +  ~  ~ | Logit |
| Marcum and Brown (2016) | 1950-1999 | 167 | 5,513 | MM, PT | Winning coalition size  W/S ratio  Personalist regime  Non-dynastic monarchy  Single-party regime  Income  Negative growth  Military personnel  Military exp. p. personnel  Conflict outcome  Last coup | +  +  ~  -  -  -  +  -  -  +  - | ++  ++  ~  +  +  +  ~  ~  ~  +  + | Probit |
| Miller et al. (2016) | 1950-2010 | 174 | 7,899 | PT | Regional coups  Recent successful coup  Recent coup  Regional failed coups  Income  Democracy  Military regime  Party-based regime  Income growth  Civil violence  International violence  Regional democracy  Fuel dependence  Income inequality  Military personnel | -  ~  +  ~  -  n.l.  +  -  -  -  -  ~  ~  +  + | ~  ~  +  ~  ++  +  ~  +  ~  ~  ~  ~  ~  ~  ~ | Logit  EBA  Region FE  Year FE |
| O’Kane (1981) | 1950-1971 | 125 | 125 | Own coding | Income  Export concentration  Main export/GDP  Past coups  Recent independence  Foreign troops | -  +  n.l.  +  -  - | +  +  ~  +  +  + | Discriminant analysis |
| O’Kane (1993) | 1950-1990 | 42 | 42 | Own coding | Income  Export concentration  Main export/GDP  Past coups  Foreign troops | -  +  n.l.  +  - | +  +  ~  +  + | Discriminant analysis |
| Piplani and Talmadge (2015) | 1950-2010 | 154 | 5,024 | PT | Interstate conflict  Conflict duration  Civil conflict  Fatalities  Revisionist state  Democracy  Regime duration  Income growth  Income  Military exp.  Military personnel  Population  Ethnic fractionalization | +  -  +  +  -  -  -  -  -  +  +  -  - | ~  ++  +  ++  ~  ++  +  ~  ++  ~  ~  ++  ~ | Cox model  Region FE |
| Powell (2012) | 1961-2000 | n/a | 4,695 | PT | Military exp. growth  Military exp. p. personnel  Military personnel  Coup-proofing  Income growth  Income  Instability  Democracy  Authoritarian  Military regime  Time since coup | ~  -  -  ~  -  -  +  -  -  +  - | ~  ~  ++  ~  ~  ~  ++  ~  ~  ++  + | Probit |
| Powell et al. (2016) | 1950-2014 | 54 | 2,732 | PT | African Union member  Cold War  Income  Democracy  Income growth  Regional democracy  Military exp./GDP  Time since coup | -  +  -  ~  -  ~  -  n.l. | +  ~  +  ~  ~  ~  ~  ~ | Probit |
| Rowe (1974) | 1953-1972 | 47 | 47 | Own coding | Past coups  US military aid  US military training | ~  ~  ~ | ~  ~  ~ | OLS |
| Slater et al. (2014) | 1972-2007 | 139 | 3,186 | MM | Taxes  Income growth  Income  Government expenditure  Manufacturing value added  Resource rents  Population  Age dependency ratio  Openness  Regional democracy  Time since coup | -  -  -  +  +  +  +  -  -  +  - | ++  +  +  ~  ~  ~  ~  +  ~  ~  ~ | Negative binomial regression |
| Thyne (2010) | 1960-1999 | 19 | 7,125 | MM, PT | US signals  US signals (positive)  US signals (negative)  US aid  US MID  Democracy  Military regime  Instability  Civil war  Income  Income growth | -  -  -  -  +  -  +  +  -  -  - | +  ~  ++  +  +  ~  ++  +  ~  ~  ~ | Logit |

| Tusalem (2010) | 1970-1990 | 88 | 1,659 | Banks | Contract-intensive money  Primary commodity exporter  Democracy  Past coups  Income  British colony  Government capital expenditure  Ethnic fractionalization | -  +  +  +  -  -  +  + | ++  +  +  +  ~  ~  ~  ~ | OLS |
| --- | --- | --- | --- | --- | --- | --- | --- | --- |
| Wang (1998) | 1960-1990 | 35 | 35 | Own coding | Arms transfers  Lagged arms transfers  Military centrality  Domestic economy  Social mobilization  Ethnic dominance  Length of military rule  French colony  Past coups | +  -  +  -  -  ~  +  -  + | ~  ++  ++  ~  ~  ~  ~  +  ~ | Poisson regression |
| Wells (1974) | 1960-1969 | 31 | 31 | Own coding | Population  Population growth  Urbanization  Centrality  Literacy  Mass media  Income  Income growth  Military personnel p. population  Military personnel  Police personnel  Military exp.  Military exp./budget  Military exp./GDP  US aid | +  +  +  +  +  -  -  -  +  +  +  -  +  +  - | ~  ~  ~  ~  ~  ~  ~  ~  ~  ~  ~  ~  ~  ~  ~ | OLS |

| Wig and Rod (2016) | 1950-2008 | 117 | 958 | PT | Opposition gained votes in election  Postelection riots or protests  Income  Income growth  Regime age  Time since coup  First competitive election | +  +  -  -  ~  -  + | +  ++  ~  ~  ~  +  ~ | RE Logit |
| --- | --- | --- | --- | --- | --- | --- | --- | --- |
| Wobig (2015) | 1991-2008 | n/a | 2,653 | MM, PT | Democracy clause  Income  Income growth  Democracy  Military regime  Regional democracy  Domestic conflict  Time since coup | -  -  -  n.l.  +  ~  +  - | ~  +  ~  +  +  ~  ~  + | Logit |

Note: “Obs.” is the number of observations. “Sign.” is the statistical significance of each variable: ++ is significant at the 1%-level, + at the 10%-level, ~ not (or not consistently) at the 10%-level. Analogously, the estimated effect is reported as positive (+), negative (-), nonlinear (n.l.) or unstable (~). MM=Marshall (2015) & Marshall et al. (2014), PT=Powell and Thyne (2011).

**Online Appendix 2 for „When to Expect a Coup d’État? An Extreme Bounds Analysis of Coup Determinants“**

Non-robust results, LPM with region-fixed effects

| Variable | Avg. β | Avg. SE | % Sign. | CDF | Combi | Avg. N |
| --- | --- | --- | --- | --- | --- | --- |
| Anti-Government Demonstrations | 0.0004 | 0.0003 | 50.19 | 0.8739 | 32564 | 47440 |
| Civil Warfare | 0.0008 | 0.0006 | 36.13 | 0.8687 | 32564 | 46317 |
| Interstate armed conflict | -0.0021 | 0.0017 | 17.59 | 0.8639 | 32510 | 13605 |
| Is Chief Executive a Military Officer? | 0.0017 | 0.0015 | 62.70 | 0.8634 | 32564 | 39344 |
| Riots | 0.0005 | 0.0003 | 36.65 | 0.8569 | 32564 | 47438 |
| Income Inequality | -0.0001 | 0.0001 | 7.38 | 0.8534 | 32564 | 30524 |
| Internationalized Internal Armed Conflict | -0.0012 | 0.0009 | 40.25 | 0.8424 | 32510 | 13605 |
| Size of Government | -0.0005 | 0.0005 | 1.30 | 0.8401 | 32564 | 15546 |
| Population Size | -0.0004 | 0.0003 | 37.27 | 0.8374 | 32564 | 47721 |
| Assassinations | 0.0005 | 0.0004 | 42.50 | 0.8342 | 32564 | 47446 |
| Economic Reform | 0.0100 | 0.0095 | 13.59 | 0.8110 | 32564 | 37017 |
| Inflation | -0.0002 | 0.0006 | 34.69 | 0.8077 | 32564 | 43799 |
| Guerrilla Warfare | 0.0009 | 0.0009 | 53.21 | 0.7874 | 32564 | 47446 |
| Ethnic Warfare | 0.0004 | 0.0004 | 48.86 | 0.7685 | 32564 | 46317 |
| Religion Fractionalization | -0.0012 | 0.0016 | 4.30 | 0.7663 | 32564 | 47399 |
| Negative Economic Growth | 0.0009 | 0.0012 | 9.30 | 0.7647 | 32564 | 47721 |
| Mineral Rents | 0.0001 | 0.0001 | 14.42 | 0.7608 | 32564 | 41497 |
| Oil Exports | 0.0001 | 0.0001 | 10.90 | 0.7488 | 32564 | 29714 |
| Population Density | 0.0004 | 0.0006 | 9.28 | 0.7474 | 32564 | 45829 |
| Military Personnel | -0.0003 | 0.0003 | 30.13 | 0.7405 | 32564 | 44479 |
| Trade | -0.0054 | 0.0076 | 29.40 | 0.7349 | 32564 | 43919 |
| No War Previous 10 Years | -0.0007 | 0.0011 | 19.33 | 0.7348 | 32564 | 46320 |
| Military Expenditure per Personnel | 2.31E-06 | 3.17E-06 | 5.13 | 0.7324 | 32564 | 42354 |
| Coup Spillover | 0.0081 | 0.0103 | 38.41 | 0.7058 | 32563 | 47722 |
| Age Dependency Ratio | -4.6E-05 | 8.6E-05 | 10.16 | 0.7056 | 32564 | 46387 |
| World Bank Project | 0.0010 | 0.0013 | 9.60 | 0.7023 | 32564 | 30346 |
| Natural Resource Rents | 1.6E-05 | 2.7E-05 | 0.18 | 0.7020 | 32564 | 39833 |
| Oil Production | -5.1E-12 | 9.5E-12 | 6.47 | 0.6972 | 32564 | 46708 |
| French Colony | 0.0005 | 0.0012 | 11.29 | 0.6929 | 32564 | 47721 |
| Never Colony | -0.0006 | 0.0011 | 13.36 | 0.6901 | 32564 | 47721 |
| Internal armed conflict | 0.0005 | 0.0008 | 9.88 | 0.6817 | 32510 | 13605 |
| Military Expenditure | -0.0003 | 0.0002 | 27.58 | 0.6744 | 32564 | 43547 |
| Independence in Previous Five Years | 0.0037 | 0.0043 | 2.46 | 0.6706 | 32276 | 48010 |
| Language Fractionalization | -0.0006 | 0.0016 | 3.16 | 0.6564 | 32564 | 46257 |
| Urbanization | -0.0082 | 2.6E-05 | 3.05 | 0.6503 | 32564 | 46504 |
| War Spillover | 0.0012 | 0.0029 | 4.72 | 0.6486 | 32563 | 47722 |
| Ethnic Fractionalization | 0.0006 | 0.0019 | 1.33 | 0.6470 | 32564 | 47236 |
| Aid | 3.6E-05 | 0.0001 | 5.97 | 0.6299 | 32564 | 33353 |
| International Warfare | -0.0001 | 0.0004 | 15.20 | 0.6281 | 32559 | 46324 |
| Military Expenditure Growth | 0.0004 | 0.0011 | 0.07 | 0.6096 | 32564 | 42352 |
| IMF Program | -0.0001 | 0.0009 | 2.10 | 0.6048 | 32564 | 42996 |
| International Violence | 0.0010 | 0.0024 | 6.54 | 0.5986 | 32564 | 46317 |
| British Colony | -0.0001 | 0.0010 | 5.91 | 0.5986 | 32564 | 47721 |
| Civil Violence | -0.0002 | 0.0008 | 7.87 | 0.5837 | 32564 | 46317 |
| Latitude | -0.0003 | 0.0040 | 0.19 | 0.5816 | 32564 | 43523 |
| Government Consumption | 0.0001 | 0.0033 | 0.84 | 0.5615 | 32564 | 47721 |
| Ethnic Violence | -0.0001 | 0.0007 | 4.73 | 0.5597 | 32564 | 46317 |
| Regime Durability | -0.0011 | 0.0000 | 1.30 | 0.5372 | 32564 | 45191 |
| Education | 3.16E-05 | 0.0006 | 0.54 | 0.5135 | 32399 | 9160 |
| Small Island | 0.0045 | 0.0025 | 17.07 | 0.5093 | 32537 | 47437 |
| Coup-Proofing | 1.43E-05 | 0.0007 | 1.11 | 0.5064 | 32564 | 39847 |

Non-robust results, LPM with country-fixed effects

| Variable | Avg. β | Avg. SE | % Sign. | CDF | Combi | Avg. N |
| --- | --- | --- | --- | --- | --- | --- |
| Urbanization | -0.0002 | 0.0001 | 60.45 | 0.8924 | 20871 | 43189 |
| General Strikes | 0.0011 | 0.0007 | 48.16 | 0.8805 | 20871 | 43852 |
| Anti-Government Demonstrations | 0.0005 | 0.0002 | 70.26 | 0.8705 | 20871 | 43846 |
| Assassinations | 0.0005 | 0.0003 | 67.28 | 0.8685 | 20871 | 43852 |
| Ethnic Warfare | 0.0009 | 0.0005 | 74.27 | 0.8634 | 20871 | 42931 |
| Size of Government | -0.0008 | 0.0006 | 46.51 | 0.8631 | 20871 | 14852 |
| Civil Violence | 0.0015 | 0.0012 | 41.10 | 0.8601 | 20871 | 42931 |
| Guerrilla Warfare | 0.0011 | 0.0007 | 58.00 | 0.8531 | 20871 | 43852 |
| Internal armed conflict | 0.0029 | 0.0015 | 72.96 | 0.8531 | 20826 | 13021 |
| Interstate armed conflict | -0.0031 | 0.0027 | 51.88 | 0.8444 | 20826 | 13021 |
| No War Previous 10 Years | -0.0019 | 0.0015 | 54.08 | 0.8401 | 20871 | 42935 |
| Economic Reform | 0.0096 | 0.0091 | 23.72 | 0.8199 | 20871 | 34417 |
| Trade | -2.0E-05 | 2.5E-05 | 15.09 | 0.7895 | 20871 | 40959 |
| Is Chief Executive a Military Officer? | 0.0019 | 0.0017 | 55.99 | 0.7807 | 20871 | 37024 |
| Internationalized Internal Armed Conflict | -0.0013 | 0.0015 | 17.55 | 0.7684 | 20826 | 13021 |
| Inflation | -0.0008 | 0.0012 | 2.65 | 0.7551 | 20871 | 40859 |
| International Violence | 0.0016 | 0.0020 | 18.94 | 0.7431 | 20871 | 42931 |
| Negative Economic Growth | 0.0007 | 0.0011 | 9.71 | 0.7311 | 20871 | 44079 |
| Coup Spillovers | 0.0081 | 0.0088 | 34.79 | 0.7213 | 20871 | 44079 |
| Education | 0.0021 | 0.0028 | 14.91 | 0.7003 | 20685 | 8663 |
| Mineral Rents | 0.0001 | 0.0002 | 14.74 | 0.6997 | 20871 | 38976 |
| Military Expenditure | 0.0002 | 0.0006 | 39.92 | 0.6800 | 20871 | 40329 |
| Aid | -0.0001 | 0.0001 | 18.71 | 0.6770 | 20871 | 31188 |
| IMF Program | -0.0003 | 0.0010 | 7.47 | 0.6745 | 20871 | 40274 |
| War Spillover | 0.0011 | 0.0035 | 9.21 | 0.6551 | 20871 | 44079 |
| World Bank Project | 0.0012 | 0.0014 | 13.57 | 0.6547 | 20826 | 28541 |
| Oil Exports | -0.0005 | 0.0009 | 5.06 | 0.6396 | 20871 | 28168 |
| Military Expenditure per Personnel | 5.0E-06 | 1.1E-05 | 5.66 | 0.6394 | 20871 | 39333 |
| Coup-Proofing | 0.0001 | 0.0010 | 25.52 | 0.6242 | 20871 | 37496 |
| Income Inequality | 0.0001 | 0.0001 | 12.73 | 0.6232 | 20871 | 28833 |
| Oil Production | -1.4E-11 | 0.1932 | 0.00 | 0.6230 | 20872 | 43334 |
| Ethnic Violence | -0.0004 | 0.0010 | 6.17 | 0.6192 | 20871 | 42931 |
| Population Density | -1.4E-05 | 0.0081 | 19.81 | 0.6184 | 20871 | 42611 |
| Natural Resource Rents | 2.5E-05 | 0.0001 | 9.31 | 0.5954 | 20871 | 37430 |
| Military Expenditure Growth | 0.0003 | 0.0009 | 4.57 | 0.5721 | 20871 | 39308 |
| International Warfare | -0.0002 | 0.0008 | 6.64 | 0.5718 | 20866 | 42940 |
| Government Consumption | -0.0005 | 0.0051 | 0.45 | 0.5239 | 20871 | 44079 |
| Age Dependency Ratio | 1.5E-05 | 0.0004 | 1.76 | 0.5232 | 20871 | 43097 |
| Independence in Previous Five Years | 0.0034 | 0.0032 | 24.62 | 0.5171 | 20722 | 44332 |
| Military Personnel | -0.0001 | 0.0011 | 2.00 | 0.5046 | 20871 | 41128 |
